# Supplementary material for: Differences in park characteristic preferences for visitation and physical activity among adolescents: A latent class analysis
Source: PubMed Central journal article supplement (PMC6422290; doi:10.1371/journal.pone.0212920), 2019-03-18
Supplement: pone.0212920.s003.pdf [file pone.0212920.s003.pdf]

**S3 Additional file. A detailed overview of the different models for two, three, four and five subgroups is given for park visitation.**

*Table S3.1. Latent Class Estimation for park visitation*

|                                      |             |
|--------------------------------------|-------------|
| Number of replications               | 5           |
| Maximum number of iterations         | 100         |
| Convergence limit for log likelihood | 0,01000     |
| Random number seed                   | 1           |
| Null log-likelihood                  | -5384,36730 |

*Table S3.2. Summary of best replications for park visitation*

| <b>Groups</b> | <b>Log-likelihood</b> | <b>Pct Cert</b> | <b>AIC</b> | <b>CAIC</b> | <b>BIC</b> | <b>ABIC</b> | <b>Chi-Square</b> | <b>Relative Chi-Square</b> |
|---------------|-----------------------|-----------------|------------|-------------|------------|-------------|-------------------|----------------------------|
| 2             | -3531                 | 34.43           | 7123       | 7370        | 7339       | 7241        | 3707              | 120                        |
| 3             | -3454                 | 35.86           | 7002       | 7376        | 7329       | 7179        | 3861              | 82                         |
| 4             | -3410                 | 36.66           | 6947       | 7448        | 7385       | 7185        | 3948              | 62                         |
| 5             | -3388                 | 37.07           | 6934       | 7562        | 7483       | 7232        | 3992              | 51                         |

*\*Pct Cert= Percent Certainty; AIC= Akaike Info Criterion; CAIC= Consistent Akaike Info Criterion; BIC= Bayesian Information Criterion; ABIC= Adjusted Bayesian Info Criterion*

Table S3.3. Tabulation with the comparison between different groups for park visitation

**Tabulation of 2 group vs. 3 group solutions**

|       | 1   | 2   | 3   | Total |
|-------|-----|-----|-----|-------|
| 1     | 665 | 10  | 141 | 816   |
| 2     | 1   | 137 | 17  | 155   |
| Total | 666 | 147 | 158 | 971   |

**Tabulation of 3 group vs. 4 group solutions**

|       | 1   | 2   | 3   | 4  | Total |
|-------|-----|-----|-----|----|-------|
| 1     | 615 | 3   | 44  | 4  | 666   |
| 2     | 1   | 133 | 13  | 0  | 147   |
| 3     | 17  | 4   | 85  | 52 | 158   |
| Total | 633 | 140 | 142 | 56 | 971   |

**Tabulation of 4 group vs. 5 group solutions**

|       | 1   | 2   | 3  | 4   | 5   | Total |
|-------|-----|-----|----|-----|-----|-------|
| 1     | 12  | 492 | 1  | 120 | 8   | 633   |
| 2     | 0   | 0   | 1  | 2   | 137 | 140   |
| 3     | 124 | 1   | 0  | 15  | 2   | 142   |
| 4     | 10  | 8   | 36 | 0   | 2   | 56    |
| Total | 146 | 501 | 38 | 137 | 149 | 971   |

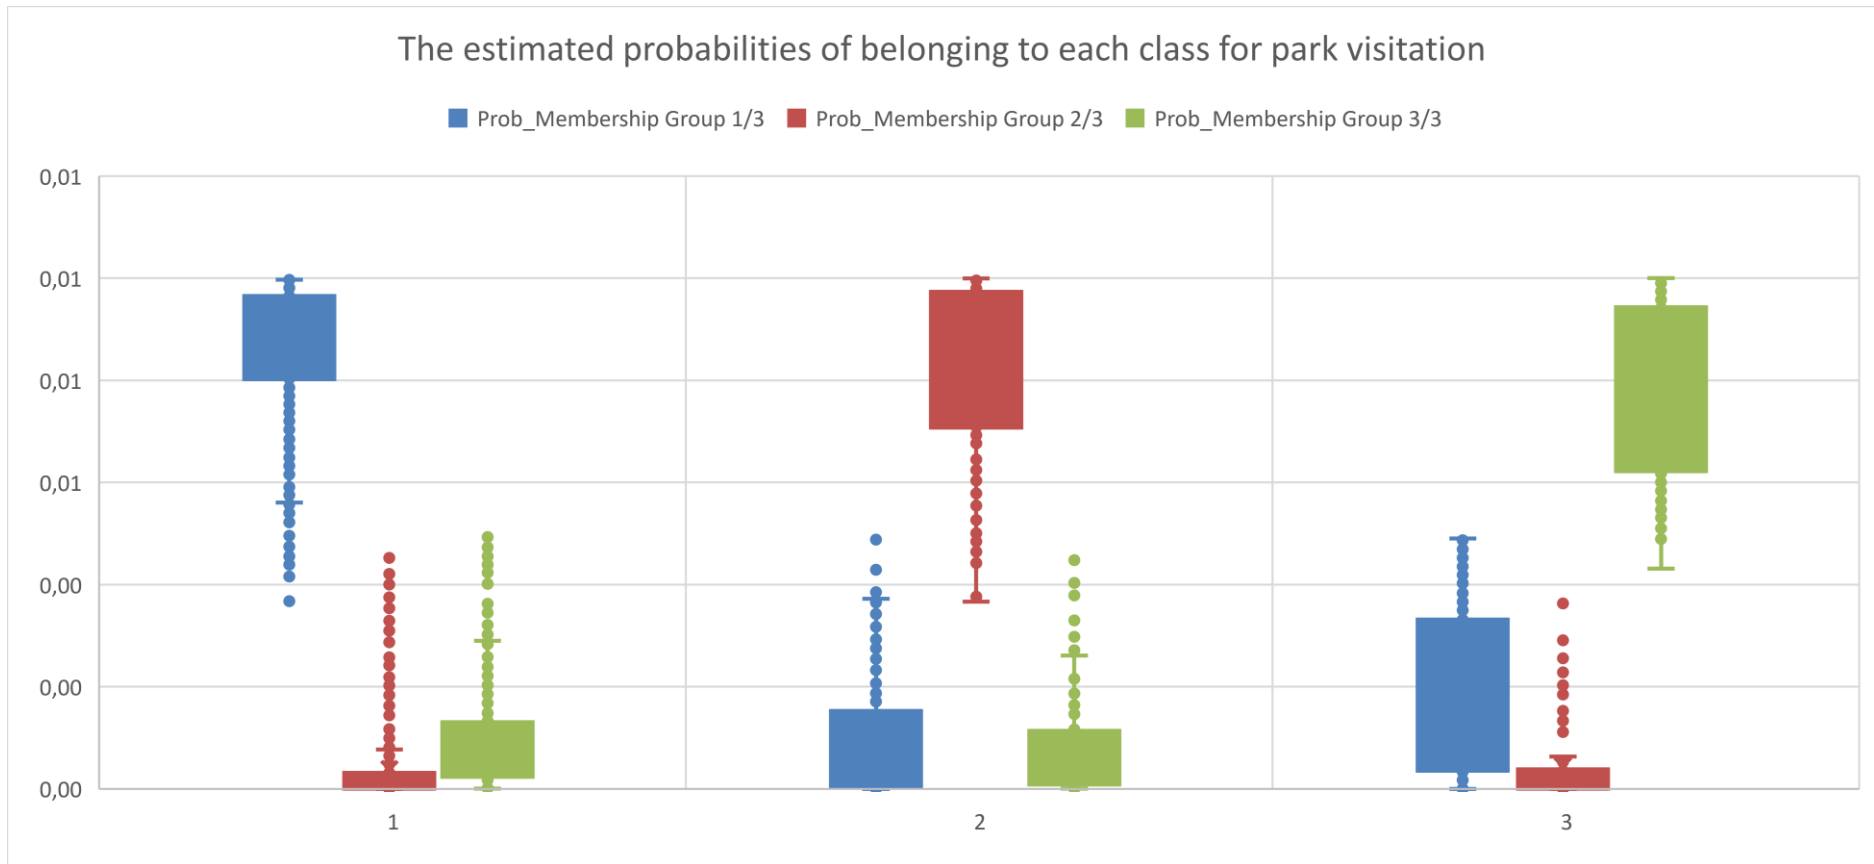

Figure S3.1. The estimated probabilities of belonging to each class of the 3-class model for park visitation
