# Supplementary material for: Differences in park characteristic preferences for visitation and physical activity among adolescents: A latent class analysis
Source: PubMed Central journal article supplement (PMC6422290; doi:10.1371/journal.pone.0212920), 2019-03-18
Supplement: pone.0212920.s004.pdf [file pone.0212920.s004.pdf]

**S4 Additional file. A detailed overview of the different models for two, three, four and five subgroups is given for park-based PA.**

*Table S4.1. Latent Class Estimation for park-based PA*

|                                      |             |
|--------------------------------------|-------------|
| Number of replications               | 5           |
| Maximum number of iterations         | 100         |
| Convergence limit for log likelihood | 0,01000     |
| Random number seed                   | 1           |
| Null log-likelihood                  | -9722,85835 |

*Table S4.2. Summary of best replications for park-based PA*

| <b>Groups</b> | <b>Log-likelihood</b> | <b>Pct Cert*</b> | <b>AIC*</b> | <b>CAIC*</b> | <b>BIC*</b> | <b>ABIC*</b> | <b>Chi-Square</b> | <b>Relative Chi-Square</b> |
|---------------|-----------------------|------------------|-------------|--------------|-------------|--------------|-------------------|----------------------------|
| 2             | -7417                 | 23.72            | 14900       | 15169        | 15136       | 15031        | 4612              | 140                        |
| 3             | -7223                 | 25.71            | 14547       | 14955        | 14905       | 14746        | 4999              | 100                        |
| 4             | -7089                 | 27.09            | 14312       | 14859        | 14792       | 14579        | 5267              | 79                         |
| 5             | -6995                 | 28.06            | 14158       | 14843        | 14759       | 14492        | 5456              | 65                         |

*\*Pct Cert= Percent Certainty; AIC= Akaike Info Criterion; CAIC= Consistent Akaike Info Criterion; BIC= Bayesian Information Criterion; ABIC= Adjusted Bayesian Info Criterion*

Table S4.3. Tabulation with the comparison between different groups for park-based PA

**Tabulation of 2 group vs. 3 group solutions**

|       | 1   | 2   | 3   | Total |
|-------|-----|-----|-----|-------|
| 1     | 152 | 4   | 411 | 567   |
| 2     | 1   | 337 | 65  | 403   |
| Total | 153 | 341 | 476 | 970   |

**Tabulation of 3 group vs. 4 group solutions**

|       | 1   | 2   | 3   | 4  | Total |
|-------|-----|-----|-----|----|-------|
| 1     | 4   | 1   | 148 | 0  | 153   |
| 2     | 303 | 0   | 0   | 38 | 341   |
| 3     | 129 | 336 | 11  | 0  | 476   |
| Total | 436 | 337 | 159 | 38 | 970   |

**Tabulation of 4 group vs. 5 group solutions**

|       | 1   | 2  | 3   | 4   | 5   | Total |
|-------|-----|----|-----|-----|-----|-------|
| 1     | 0   | 0  | 414 | 4   | 18  | 436   |
| 2     | 6   | 0  | 22  | 217 | 92  | 337   |
| 3     | 151 | 0  | 1   | 0   | 7   | 159   |
| 4     | 0   | 38 | 0   | 0   | 0   | 38    |
| Total | 157 | 38 | 437 | 221 | 117 | 970   |

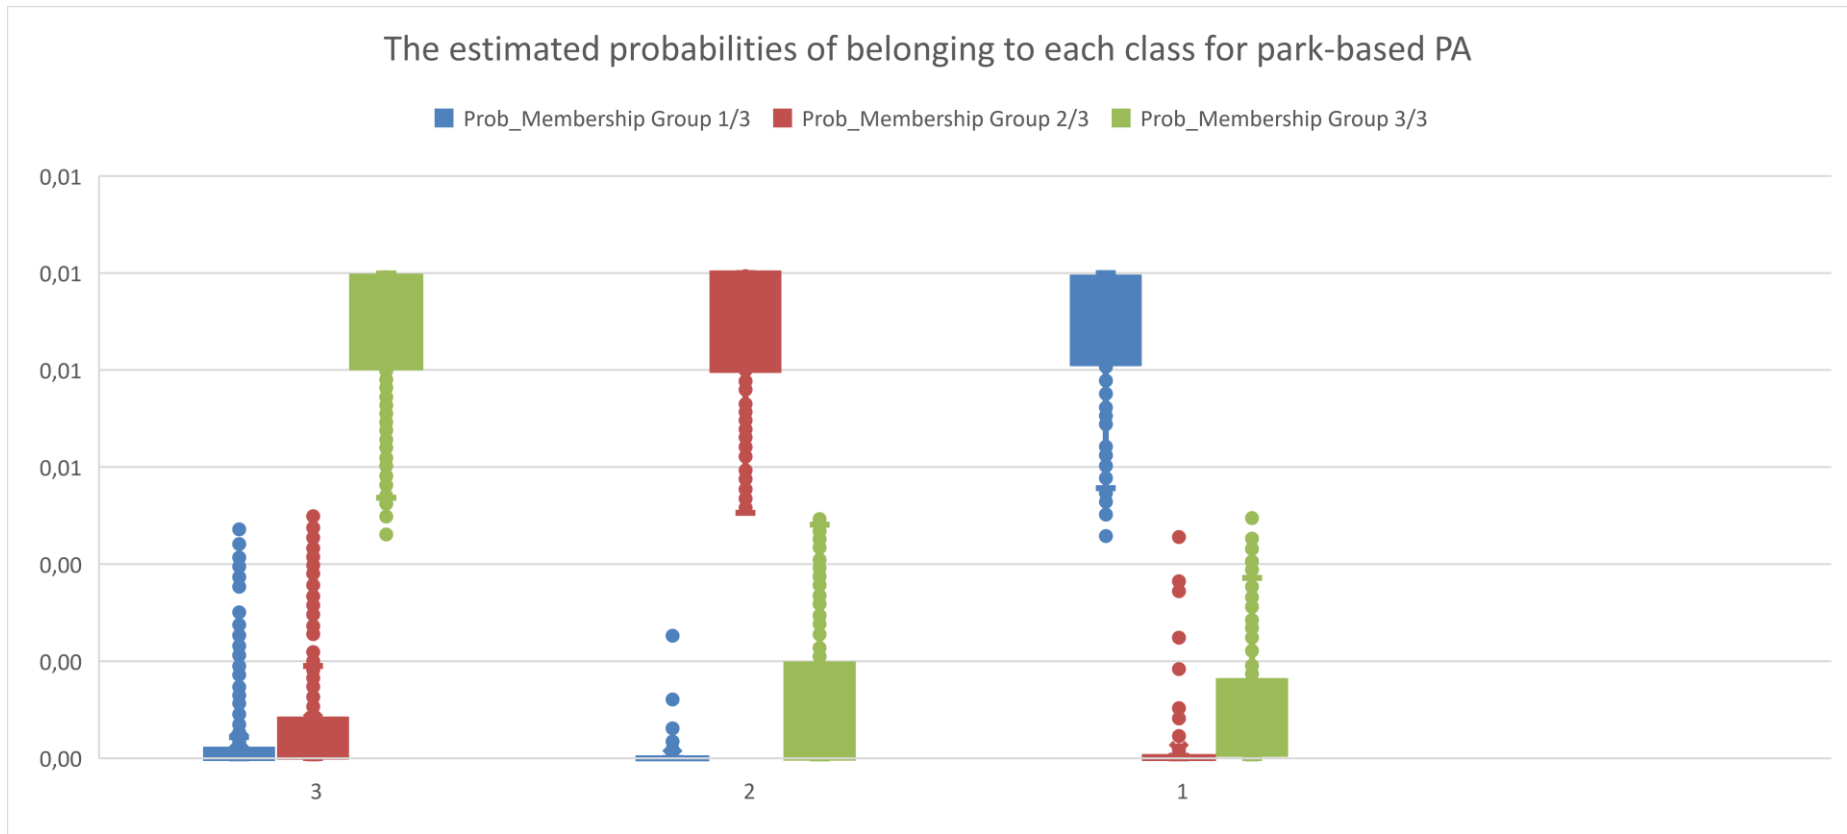

*Figure S4.1. The estimated probabilities of belonging to each class of the 3-class model for park-based PA*
