# Supplementary material for: Differences in park characteristic preferences for visitation and physical activity among adolescents: A latent class analysis
Source: PubMed Central journal article supplement (PMC6422290; doi:10.1371/journal.pone.0212920), 2019-03-18
Supplement: pone.0212920.s006.pdf [file pone.0212920.s006.pdf]

## S1 Table. Relative importances of each park characteristic for park visitation, socio-demographics, PA behavior and park use characteristics for the three subgroups identified by latent class analysis (complete table)

S1 Table. Relative importances of each park characteristic for park visitation, socio-demographics, PA behavior and park use characteristics for the three subgroups identified by latent class analysis (complete table).

|                                                 | Subgroup 1              | Subgroup 2              | Subgroup 3          | <i>p-value</i> |
|-------------------------------------------------|-------------------------|-------------------------|---------------------|----------------|
| <i>Subgroup Sizes (n)</i>                       | n= 666<br>68.6%         | n=147<br>15.1%          | n=158<br>16.3%      |                |
| <i>Relative Importances (M (95 % CI))</i>       |                         |                         |                     |                |
| Upkeep                                          | 48.1 (47.5,48.6)        | 25.7 (24.1,27.2)        | 26.2 (24.6,27.8)    |                |
| Playground/outdoor fitness                      | 15.3 (14.9,15.8)        | 14.6 (13.5,15.6)        | 21.1 (19.7,22.6)    |                |
| Sport field                                     | 8.0 (7.6,8.4)           | 30.2 (28.8,31.6)        | 9.3 (8.4,10.3)      |                |
| Activity peers                                  | 5.0 (4.7,5.2)           | 6.5 (5.8,7.2)           | 11.3 (10.2,12.3)    |                |
| Homeless person                                 | 5.6 (5.4,5.9)           | 4.3 (3.7,4.8)           | 8.2 (7.2,9.3)       |                |
| Walking paths                                   | 5.4 (5.2,5.6)           | 6.1 (5.7,6.6)           | 6.9 (6.3,7.5)       |                |
| Naturalness                                     | 4.5 (4.3,4.7)           | 4.9 (4.3,5.4)           | 6.3 (5.6,7.1)       |                |
| Mother with a child                             | 3.4 (3.3,3.6)           | 2.6 (2.3,3.0)           | 3.4 (3.0,3.8)       |                |
| Benches                                         | 2.4 (2.2,2.5)           | 2.8 (2.5,3.2)           | 4.1 (3.6,4.6)       |                |
| Drinking fountain                               | 2.2 (2.1,2.4)           | 2.4 (2.1,2.7)           | 3.1 (2.7,3.5)       |                |
| <i>Socio-demographic characteristics</i>        |                         |                         |                     |                |
| Age (years, M±SD)                               | 13.2 ± 1.2 <sup>b</sup> | 13.5 ± 1.4 <sup>a</sup> | 13.4 ± 1.3          | 0.015*         |
| Gender (% women)                                | 61.6 <sup>b</sup>       | 20.4 <sup>a,c</sup>     | 53.8 <sup>b</sup>   | <0.001*        |
| Born in Belgium (%)                             | 93.7                    | 95.9                    | 93.7                | 0.576          |
| Other ethnicity (%)                             | 31.1 <sup>b,c</sup>     | 44.2 <sup>a</sup>       | 46.8 <sup>a</sup>   | <0.001*        |
| Education (% at least one parent high educated) | 79.1 <sup>c</sup>       | 81.4 <sup>c</sup>       | 66.7 <sup>a,b</sup> | 0.011*         |
| SES (%)                                         |                         |                         |                     | 0.486          |
| - Low                                           | 4.8                     | 5.4                     | 7.6                 |                |
| - Medium                                        | 30.2                    | 30.6                    | 34.2                |                |
| - High                                          | 65.0                    | 63.9                    | 58.2                |                |
| Living area (%)                                 |                         |                         |                     | 0.007*         |
| - Rural                                         | 11.1                    | 7.5                     | 10.8                |                |
| - Suburban                                      | 60.5                    | 49.7                    | 52.5                |                |
| - Urban                                         | 28.4                    | 42.9                    | 36.7                |                |
| Meets PA guidelines (%)                         | 43.1                    | 58.5                    | 44.9                | 0.003*         |
| Member of sport club (%)                        | 67.7                    | 79.6                    | 57.6                | <0.001*        |
| How many friends do you have?                   | 6.8 ± 9.1               | 11.6 ± 15.3             | 8.9 ± 12.3          | <0.001*        |
| Categories z-scores (BMI) (%)                   |                         |                         |                     | 0.374          |
| - Underweight                                   | 6.7                     | 2.8                     | 6.0                 |                |
| - Normal weight                                 | 86.7                    | 90.1                    | 84.8                |                |
| - Overweight                                    | 6.7                     | 7.1                     | 9.3                 |                |

|                                                                      |                            |                              |                            |         |
|----------------------------------------------------------------------|----------------------------|------------------------------|----------------------------|---------|
| <b><i>PA behavior (min/week)</i></b>                                 |                            |                              |                            |         |
| Light PA (M±SD)                                                      | 248.3 ± 211.4              | 236.6 ± 217.2                | 267.3 ± 239.3              | 0.448   |
| Moderate-to-vigorous intensity PA (M±SD)                             | 438.6 ± 367.2 <sup>b</sup> | 569.3 ± 390.0 <sup>a,c</sup> | 443.7 ± 382.0 <sup>b</sup> | 0.001*  |
| <b><i>Park use characteristics</i></b>                               |                            |                              |                            |         |
| Frequency of visitation (M±SD)                                       | 3.5 ± 1.7                  | 3.8 ± 1.9                    | 3.8 ± 1.8                  | 0.032*  |
| Park duration (min/3 months) (M±SD)                                  | 75.3 ± 57.1 <sup>b</sup>   | 96.3 ± 68.3 <sup>a</sup>     | 85.2 ± 64.4                | 0.001*  |
| Walking distance to closest park (min) (M±SD)                        | 14.0 ± 12.3                | 12.2 ± 11.8                  | 11.7 ± 11.0                | 0.058   |
| <b><i>Accompaniment to parks</i></b>                                 |                            |                              |                            |         |
| Friends (%)                                                          | 60.5                       | 76.7                         | 61.0                       | 0.002*  |
| Parents/grandparents/aunt/uncle (%)                                  | 38.6                       | 14.7                         | 29.1                       | <0.001* |
| Dog (%)                                                              | 16.0                       | 7.0                          | 7.8                        | 0.003*  |
| (Step)brother/sister/niece/nephew (%)                                | 37.9                       | 27.9                         | 34.8                       | 0.096   |
| Organised group (%)                                                  | 19.3                       | 17.8                         | 13.5                       | 0.272   |
| Alone (%)                                                            | 14.6                       | 14.7                         | 14.2                       | 0.990   |
| <b><i>Usual activities during park visitation</i></b>                |                            |                              |                            |         |
| Walking (%)                                                          | 67.8                       | 34.1                         | 53.2                       | <0.001* |
| Ball sports (%)                                                      | 37.7                       | 72.9                         | 39.7                       | <0.001* |
| Sitting/lying down (%)                                               | 39.8                       | 27.9                         | 34.0                       | 0.029*  |
| Biking (%)                                                           | 31.8                       | 27.1                         | 26.2                       | 0.309   |
| Jogging (%)                                                          | 21.6                       | 17.1                         | 19.1                       | 0.473   |
| Standing (%)                                                         | 16.0                       | 11.6                         | 20.6                       | 0.135   |
| Skating (%)                                                          | 14.1                       | 18.6                         | 14.2                       | 0.416   |
| Active games (%)                                                     | 15.7                       | 9.3                          | 15.6                       | 0.173   |
| Exercising (%)                                                       | 10.4                       | 17.8                         | 10.6                       | 0.056   |
| Yoga (%)                                                             | 1.0                        | 0.8                          | 0.7                        | 0.913   |
| <b><i>Usual transportation to parks in the last three months</i></b> |                            |                              |                            |         |
| Walking (%)                                                          | 69.7                       | 70.5                         | 73.8                       | 0.644   |
| Biking (%)                                                           | 40.9                       | 41.1                         | 34.8                       | 0.395   |
| Car/moped/motorbike as a passenger (%)                               | 27.0                       | 20.9                         | 20.6                       | 0.150   |
| Public transportation (%)                                            | 17.0                       | 16.3                         | 17.7                       | 0.951   |
| Skateboard/long board/scooter (%)                                    | 10.8                       | 11.6                         | 9.2                        | 0.801   |

<sup>a</sup> significant difference with subgroup 1; <sup>b</sup> significant difference with subgroup 2; <sup>c</sup> significant difference with subgroup 3; \* p < 0.05
