# Supplementary material for: Differences in park characteristic preferences for visitation and physical activity among adolescents: A latent class analysis
Source: PubMed Central journal article supplement (PMC6422290; doi:10.1371/journal.pone.0212920), 2019-03-18
Supplement: pone.0212920.s007.pdf [file pone.0212920.s007.pdf]

## S2 Table. Relative importances of each park characteristic for park-based PA, socio-demographics, PA behavior and park use characteristics for the three subgroups identified by latent class analysis (complete table)

S2 Table. Relative importances of each park characteristic for park-based PA, socio-demographics, PA behavior and park use characteristics for the three subgroups identified by latent class analysis (complete table).

|                                                    | Subgroup 1              | Subgroup 2              | Subgroup 3                | <i>p-value</i> |
|----------------------------------------------------|-------------------------|-------------------------|---------------------------|----------------|
| <i>Subgroups Sizes (n)</i>                         | n=341                   | n= 153                  | n=476                     |                |
|                                                    | 35.2%                   | 15.8%                   | 49.1%                     |                |
| <i>Average relative importances % (M (95% CI))</i> |                         |                         |                           |                |
| Upkeep (M (95% CI))                                | 44.0 (42.6,45.4)        | 32.3 (30.3,34.2)        | 41.9 (40.8,43.0)          |                |
| Playground/outdoor fitness                         | 14.5 (13.9,15.2)        | 15.3 (14.3,16.3)        | 17.6 (17.0,18.3)          |                |
| Sport field                                        | 9.1 (8.2,9.9)           | 23.1 (21.2,25.0)        | 9.7 (7.0,10.3)            |                |
| Activity peers                                     | 6.3 (5.8,6.9)           | 6.0 (5.3,6.7)           | 6.2 (5.8,6.7)             |                |
| Homeless person                                    | 6.5 (6.0,7.0)           | 5.0 (4.4,5.5)           | 5.7 (5.3,6.0)             |                |
| Walking paths                                      | 5.8 (5.5,6.1)           | 5.8 (5.4,6.3)           | 5.7 (5.5,5.9)             |                |
| Naturalness                                        | 4.9 (4.6,5.3)           | 4.8 (4.3,5.4)           | 4.8 (4.5,5.1)             |                |
| Mother with a child                                | 3.4 (3.2,3.7)           | 2.8 (2.5,3.1)           | 3.4 (3.2,3.6)             |                |
| Benches                                            | 2.9 (2.7,3.2)           | 2.6 (2.2,2.9)           | 2.6 (2.4,2.8)             |                |
| Drinking fountain                                  | 2.4 (2.2,2.6)           | 2.4 (2.1,2.7)           | 2.4 (2.3,2.6)             |                |
| <i>Socio-demographic characteristics</i>           |                         |                         |                           |                |
| Age (years, M±SD)                                  | 13.6 ± 1.2 <sup>c</sup> | 13.5 ± 1.4 <sup>c</sup> | 13.1 ± 1.2 <sup>a,b</sup> | <0.001*        |
| Gender (% women)                                   | 65.1 <sup>b,c</sup>     | 19.6 <sup>a,c</sup>     | 57.1 <sup>a,b</sup>       | <0.001*        |
| Born in Belgium (%)                                | 93.8                    | 95.4                    | 93.7                      | 0.725          |
| Other ethnicity (%)                                | 38.1                    | 35.9                    | 33.8                      | 0.448          |
| Education (% at least one parent high educated)    | 74.3                    | 82.1                    | 78.4                      | 0.223          |
| SES (%)                                            |                         |                         |                           | 0.242          |
| - Low                                              | 6.5                     | 5.2                     | 4.6                       |                |
| - Medium                                           | 32.6                    | 24.2                    | 31.9                      |                |
| - High                                             | 61.0                    | 70.6                    | 63.4                      |                |
| Living area (%)                                    |                         |                         |                           | 0.145          |
| - Rural                                            | 7.3                     | 12.4                    | 12.2                      |                |
| - Suburban                                         | 58.9                    | 53.6                    | 58.0                      |                |
| - Urban                                            | 33.7                    | 34.0                    | 29.8                      |                |
| Meets PA guidelines (%)                            | 33.4                    | 63.4                    | 48.9                      | <0.001*        |
| Member of sport club (%)                           | 63.9                    | 78.4                    | 67.2                      | 0.006 *        |
| How many friends do you have?                      | 7.3 ± 10.5              | 9.2 ± 12.8              | 7.8 ± 10.5                | 0.211          |
| Categories z-scores (BMI) (%)                      |                         |                         |                           | 0.047 *        |
| - Underweight                                      | 4.2                     | 4.1                     | 7.9                       |                |
| - Normal weight                                    | 86.4                    | 91.2                    | 58.7                      |                |

|                                                |                              |                              |                              |         |
|------------------------------------------------|------------------------------|------------------------------|------------------------------|---------|
| - Overweight                                   | 9.3                          | 4.7                          | 6.4                          |         |
| <b>PA behavior (min/week)</b>                  |                              |                              |                              |         |
| Light PA (M±SD)                                | 222.6 ± 197.6 <sup>c</sup>   | 261.5 ± 232.8                | 264.2 ± 223.0 <sup>a</sup>   | 0.019 * |
| Moderate-to-vigorous intensity PA (M±SD)       | 370.6 ± 348.1 <sup>b,c</sup> | 585.8 ± 360.6 <sup>a,c</sup> | 482.1 ± 385.3 <sup>a,b</sup> | <0.001* |
| <b>Park use characteristics</b>                |                              |                              |                              |         |
| Park use (M±SD)                                | 3.3 ± 1.7 <sup>b,c</sup>     | 3.8 ± 1.8 <sup>a</sup>       | 3.7 ± 1.7 <sup>a</sup>       | 0.005*  |
| Park duration (min/3 months) (M±SD)            | 71.7 ± 53.6 <sup>b</sup>     | 88.7 ± 68.8 <sup>a</sup>     | 82.9 ± 61.4                  | 0.010*  |
| Walking distance to closest park (min) (M±SD)  | 13.3 ± 11.7                  | 13.6 ± 12.9                  | 13.4 ± 12.1                  | 0.973   |
| <b>Accompaniment to the park</b>               |                              |                              |                              |         |
| Friends (%)                                    | 62.4                         | 73.3                         | 60.2                         | 0.022*  |
| (Step)brother/sister/niece/nephew (%)          | 34.5                         | 25.2                         | 40.0                         | 0.006*  |
| Parents/grandparents/aunt/uncle (%)            | 33.8                         | 17.0                         | 38.4                         | <0.001* |
| Organised group (%)                            | 21.6                         | 14.8                         | 16.6                         | 0.134   |
| Alone (%)                                      | 15.7                         | 12.6                         | 14.5                         | 0.700   |
| Dog (%)                                        | 12.9                         | 10.4                         | 14.5                         | 0.464   |
| <b>Usual activities during park visitation</b> |                              |                              |                              |         |
| Walking (%)                                    | 69.0                         | 35.6                         | 62.1                         | <0.001* |
| Ball sports (%)                                | 31.4                         | 71.9                         | 42.4                         | <0.001* |
| Sitting/lying down (%)                         | 43.6                         | 24.4                         | 36.5                         | 0.001*  |
| Jogging (%)                                    | 18.5                         | 12.6                         | 24.4                         | 0.007 * |
| Active games (%)                               | 10.5                         | 5.9                          | 20.1                         | <0.001* |
| Exercising (%)                                 | 5.9                          | 10.4                         | 15.9                         | <0.001* |
| Biking (%)                                     | 27.9                         | 24.4                         | 33.6                         | 0.073   |
| Standing (%)                                   | 15.0                         | 12.6                         | 18.0                         | 0.268   |
| Skating (%)                                    | 13.2                         | 12.6                         | 16.6                         | 0.342   |
| Yoga (%)                                       | 1.4                          | 0.7                          | 0.7                          | 0.631   |
| <b>Usual transportation to parks</b>           |                              |                              |                              |         |
| Public transportation (%)                      | 22.6                         | 15.6                         | 13.5                         | 0.006 * |
| Walking (%)                                    | 72.8                         | 70.4                         | 69.0                         | 0.541   |
| Biking (%)                                     | 35.2                         | 38.5                         | 43.6                         | 0.075   |
| Car/motorbike as a passenger (%)               | 24.0                         | 21.5                         | 26.8                         | 0.418   |
| Skateboard/long board/scooter (%)              | 10.8                         | 5.2                          | 12.3                         | 0.065   |

<sup>a</sup> significant difference with subgroup 1; <sup>b</sup> significant difference with subgroup 2; <sup>c</sup> significant difference with subgroup 3; \* p < 0.05
